# Supplementary material
Source: Springer Nature journal article supplement (https://www.springermedizin.de/resource/supplementary/12950_2009_133_MOESM4_ESM.pdf/9558032)

**gIVaPLA<sub>2</sub> activity**  
(pmol/30 min/10<sup>6</sup> cells)

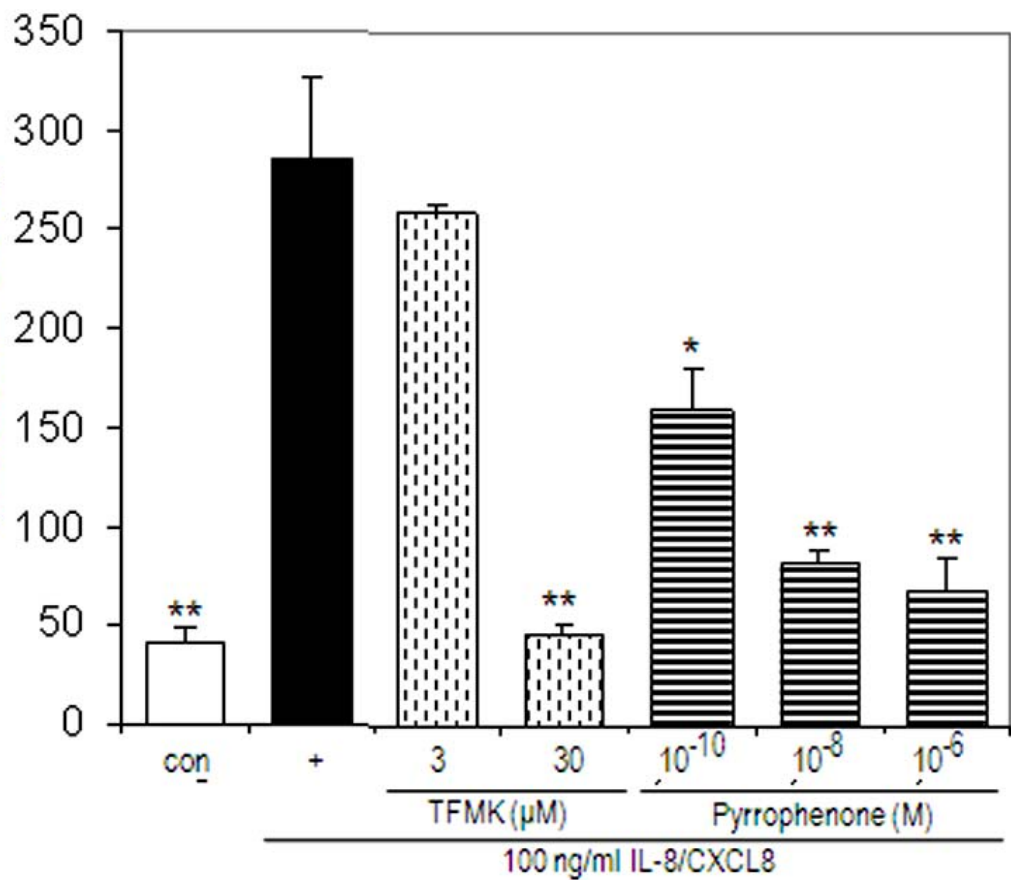

Supplement: MOESM4 [file 9558032]
